# Supplementary material for: Comparison of Stir Bar Sorptive Extraction and Solid Phase Microextraction of Volatile and Semi-Volatile Metabolite Profile of Staphylococcus aureus
Source: PubMed Central journal article supplement (PMC6982899; doi:10.3390/molecules25010055), 2019-12-23
Supplement: molecules-25-00055-s001.pdf [file molecules-25-00055-s001.pdf]

## **Supplementary Materials**

### **Comparison of stir bar sorptive extraction and solid phase microextraction of volatile and semi-volatile metabolite profile of *Staphylococcus aureus***

Kevin Berrou<sup>1</sup>, Catherine Dunyach-Remy<sup>2,3</sup>, Jean-Philippe Lavigne<sup>2,3</sup>, Benoit Roig<sup>1</sup>, Axelle Cadere<sup>1</sup>

<sup>1</sup> Univ. Nimes, EA7352 CHROME, Rue du Dr G. Salan, 30021, Nimes Cedex 1, France

<sup>2</sup> Institut National de la Santé et de la Recherche Médicale, U1047, Université Montpellier, UFR de Médecine, 30908 Nîmes, France.

<sup>3</sup> Department of Microbiology, CHU Nîmes, Univ Montpellier, 30029 Nîmes, France.

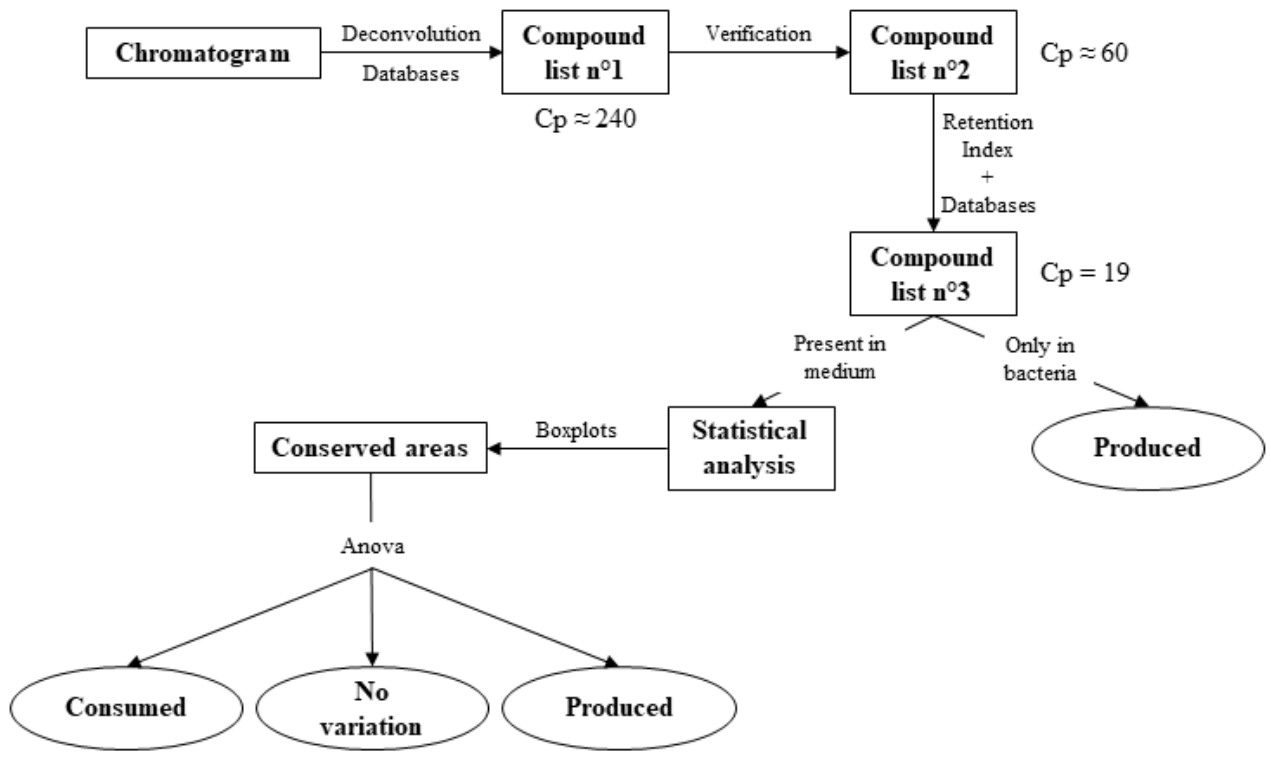

**Supplementary Figure S1.** Graphical summary of the methodology treatment of GC data. The number of compounds retained at each step is indicated by the abbreviation "Cp".

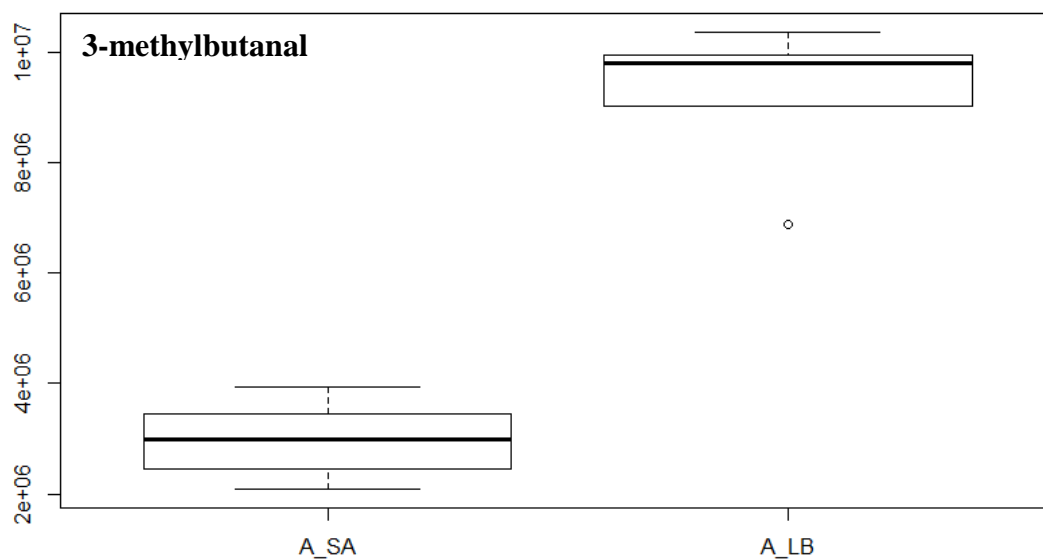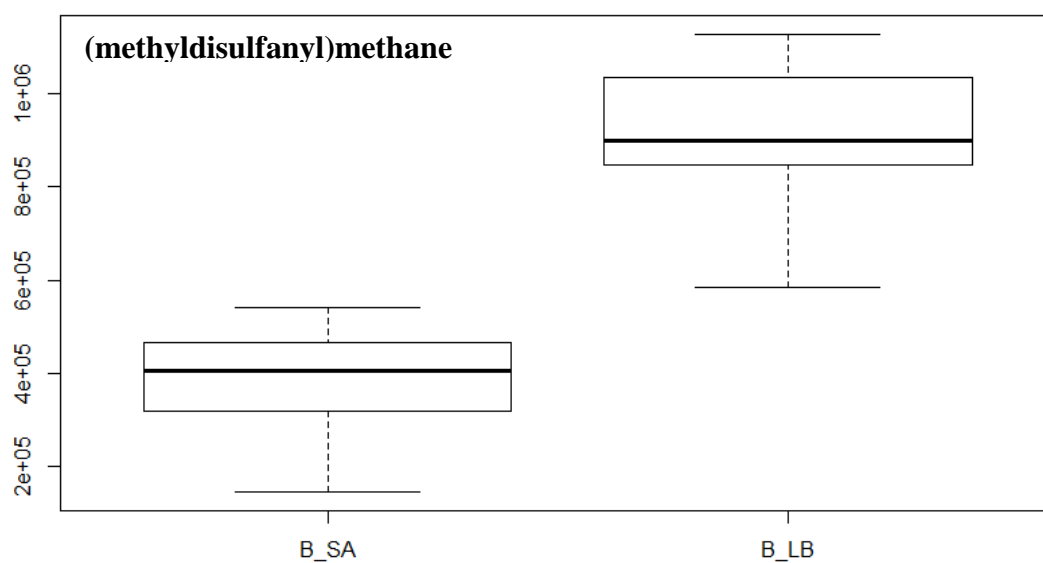

**Supplementary Figure S2.** Processing of SPME data by boxplot, carried out using RStudio software. Only the areas common to both conditions (bacterial culture (**SA**) and control (**LB**)) were analysed. Outliers are represented by points outside the boxplots, which will then be deleted from the area comparison analyses.

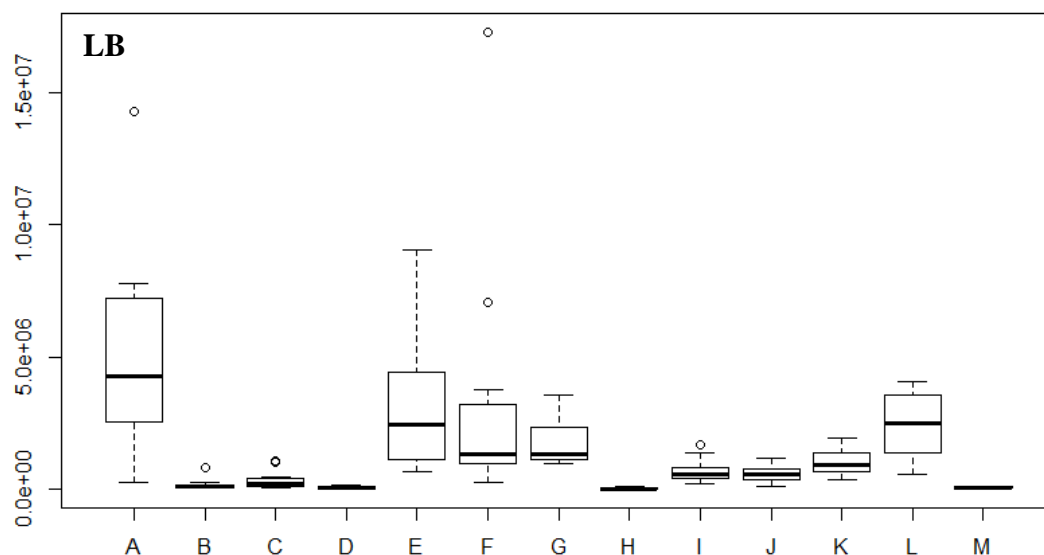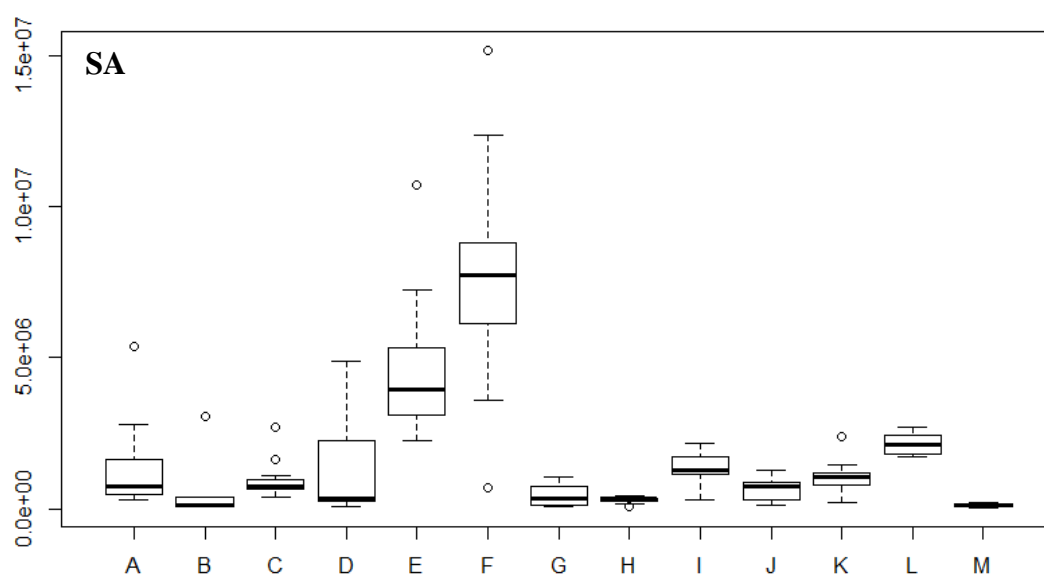

**Supplementary Figure S3.** Processing of SBSE data by boxplot, carried out using RStudio software. Only the areas common to both conditions (bacterial culture (**SA**) and control (**LB**)) were analysed. Outliers are represented by points outside the boxplots, which will then be deleted from the area comparison analyses. **A:** Acetaldehyde, **B:** Propan-2-one, **C:** Ethanol, **D:** (methyltrisulfanyl)methane, **E:** Acetic acid, **F:** Formic acid, **G:** Benzaldehyde, **H:** 2-hydroxybenzaldehyde, **I:** 1,3,5,7-Tetraazatricyclo[3.3.1.1<sup>3,7</sup>]decane, **J:** 4-methylquinoline, **K:** Isoquinoline-1-carbonitrile, **L:** Quinoline-4-carbaldehyde, **M:** 1H-indole

**Supplementary Table S1.** Mean area of each metabolite identified after SBSE/HSSE extraction (<sup>a</sup>), SBSE/HSSE and SPME extraction (<sup>b</sup>) and SPME extraction (<sup>c</sup>). The results of the Anova statistical test performed on the 12 replicates are also presented.

| Volatile metabolite                                                  | Mean area         |         | p-value               |
|----------------------------------------------------------------------|-------------------|---------|-----------------------|
|                                                                      | Bacterial culture | Control |                       |
| Acetaldehyde <sup>a</sup>                                            | 973104            | 3967090 | $3.12 \times 10^{-3}$ |
| Propan-2-one <sup>b</sup>                                            | 178196            | 106356  | $4.80 \times 10^{-5}$ |
| 3-methylbutanal <sup>c</sup>                                         | 2961625           | 9195493 | $6.38 \times 10^{-5}$ |
| Ethanol <sup>a</sup>                                                 | 709758            | 207125  | $5.32 \times 10^{-6}$ |
| (methyldisulfanyl)methane <sup>c</sup>                               | 380742            | 909914  | $2.92 \times 10^{-4}$ |
| 1-methyl-1-propylhydrazine <sup>a</sup>                              | 523915            |         |                       |
| (methyltrisulfanyl)methane <sup>a</sup>                              | 1354925           | 85454   | $3.38 \times 10^{-2}$ |
| 3-ethyl-2,5-dimethylpyrazine <sup>a</sup>                            | 116597            |         |                       |
| Acetic acid <sup>a</sup>                                             | 4061791           | 2173260 | $7.54 \times 10^{-3}$ |
| Formic acid <sup>a</sup>                                             | 7584816           | 1548316 | $4.89 \times 10^{-6}$ |
| Benzaldehyde <sup>a</sup>                                            | 445091            | 1779590 | $1.97 \times 10^{-4}$ |
| 3-methylbutanoic acid <sup>b</sup>                                   | 6220636           |         |                       |
| 2-hydroxybenzaldehyde <sup>a</sup>                                   | 323812            | 46307   | $2.41 \times 10^{-7}$ |
| Acetamide <sup>a</sup>                                               | 219024            |         |                       |
| 1,3,5,7-Tetraazatricyclo[3.3.1.1 <sup>3,7</sup> ]decane <sup>a</sup> | 1306459           | 697443  | $1.88 \times 10^{-3}$ |
| 4-methylquinoline <sup>a</sup>                                       | 648680            | 592208  | $6.90 \times 10^{-1}$ |
| Isoquinoline-1-carbonitrile <sup>a</sup>                             | 916346            | 1019306 | $6.12 \times 10^{-1}$ |
| Quinoline-4-carbaldehyde <sup>a</sup>                                | 2133235           | 2399728 | $5.37 \times 10^{-1}$ |
| 1H-indole <sup>a</sup>                                               | 114534            | 72064   | $2.76 \times 10^{-2}$ |
